# Supplementary material for: Ischemic Stroke in Acute Decompensated Heart Failure: From the KCHF Registry
Source: PubMed Central journal article supplement — J Am Heart Assoc. 2021 Oct 23;10(21):e022525. doi: 10.1161/JAHA.121.022525 (PMC8751829; doi:10.1161/jaha.121.022525), 2021-10-23
Supplement: JAH3-10-e022525-s001.pdf [file JAH3-10-e022525-s001.pdf]

# **SUPPLEMENTAL MATERIAL**

## Data S1.

### Supplemental Methods

#### Definitions for the baseline factors

The definitions of the baseline factors in the KCHF registry were as described in the previous report (Ref. 9). Atrial fibrillation (AF) included paroxysmal AF, persistent AF, permanent AF, and atrial flutter. Hypertension was defined as receiving anti-hypertensive drugs or systolic blood pressure  $\geq 140$  mmHg or diastolic blood pressure  $\geq 90$  mmHg. Diabetes mellitus was defined as treatment with oral hypoglycemic agents and/or insulin, prior clinical diagnosis of diabetes, glycosylated hemoglobin level  $\geq 6.5\%$ , casual blood glucose level  $\geq 200$  mg/dl, or fasting blood glucose level  $\geq 126$  mg/dl. The presence of COPD was determined clinically by local investigators based on history, clinical presentation, previous examinations, and medications, and recorded as COPD in the case report form at enrollment. Poor medical adherence was judged by the attending physician. Public assistance is one of the social security systems in Japan, as explained elsewhere (<http://www.ipss.go.jp/s-info/e/ssj2014/006.html>). Underlying heart disease was defined as the most likely cause of structural or functional cardiac disorders among the following: (i) coronary artery disease, (ii) hypertensive heart disease, (iii) cardiomyopathy, (iv) valvular heart disease, (v) other heart diseases. Coronary artery disease was defined as acute coronary syndrome (ACS), old myocardial infarction, or prior PCI/CABG. ACS was defined as the range of myocardial ischemic states that includes ST-elevated myocardial infarction, non-ST elevated myocardial infarction, or unstable angina. Primary cardiomyopathy was classified as hypertrophic cardiomyopathy, dilated cardiomyopathy, and dilated phase of hypertrophic cardiomyopathy. Valvular heart disease was classified as moderate to severe aortic stenosis, aortic regurgitation, mitral stenosis, mitral regurgitation (excluding functional mitral regurgitation), tricuspid regurgitation, and prosthetic valve dysfunction. For valvular heart disease, we chose only a single category, i.e., the category that seemed to be most closely related to acute heart failure. Other heart diseases included other cardiomyopathy, arrhythmia (bradycardia or tachycardia), congenital heart disease, and constrictive pericarditis. Other cardiomyopathy included arrhythmogenic right ventricular dysplasia, takotsubo cardiomyopathy, cardiac sarcoidosis, cardiac amyloidosis, left ventricular noncompaction, drug-induced cardiomyopathy, pacemaker-induced cardiomyopathy, mitochondrial cardiomyopathy, peripartum cardiomyopathy, alcoholic cardiomyopathy, beriberi heart, and others. Chronic kidney disease was defined as an estimated glomerular filtration rate (eGFR)  $< 60$  mL/min per  $1.73$  m<sup>2</sup> at admission. The eGFR was calculated using the equation for the Japanese population:  $eGFR = 194 \times (\text{serum creatinine}^{-1.094}) \times (\text{age}^{-0.287}) \times 0.739$  (for women).

**Table S1. Baseline characteristics and clinical course in patients with and without ischemic stroke.**

| <b>Variables</b>                                    | <b>Ischemic stroke<br/>(N=63)</b> | <b>No ischemic stroke<br/>(N=3993)</b> | <b>P value</b> |
|-----------------------------------------------------|-----------------------------------|----------------------------------------|----------------|
| <b>HF medications at admission</b>                  |                                   |                                        |                |
| Loop diuretics                                      | 24 (38.1)                         | 1952 (48.9)                            | 0.09           |
| Mineral corticoid receptor antagonists              | 10 (15.9)                         | 723 (18.1)                             | 0.6            |
| Renin angiotensin system inhibitors                 | 23 (36.5)                         | 1827 (45.8)                            | 0.1            |
| Beta blockers                                       | 22 (34.9)                         | 1538 (38.5)                            | 0.6            |
| <b>Intravenous treatment during hospitalization</b> |                                   |                                        |                |
| Furosemide                                          | 51 (81.0)                         | 3461 (86.7)                            | 0.2            |
| Vasodilators                                        | 41 (65.1)                         | 2204 (55.2)                            | 0.1            |
| Inotropes                                           | 14 (22.2)                         | 842 (21.1)                             | 0.8            |
| <b>Clinical course during hospitalization</b>       |                                   |                                        |                |
| Decrease in body weight, kg*                        | 5.0±5.1                           | 3.8±4.3                                | 0.08           |
| Percent changes in body weight, % †                 | 8.4±8.5                           | 6.5±7.0                                | 0.08           |
| Maximum levels of creatinine, mg/dl                 | 2.4±2.0                           | 1.9±1.6                                | 0.02           |
| Maximum increase in creatinine levels, mg/dl ‡      | 0.8±1.2                           | 0.4±0.8                                | <0.001         |
| Worsening renal function §                          | 20 (46.5)                         | 1287 (34.9)                            | 0.1            |

\* Decrease in body weight from admission to discharge. † Percent change in body weight from admission to discharge. ‡ Maximum increase in creatinine levels from admission. § Worsening renal function was defined as increase in creatinine level  $\geq$  0.3 mg/dl from baseline. HF=heart failure.

**Table S2. Univariate and multivariable logistic regression analysis for the risk factors of ischemic stroke in patients without ACS.**

| Variables                             | Univariate analysis |           |         | Multivariable analysis |           |         |
|---------------------------------------|---------------------|-----------|---------|------------------------|-----------|---------|
|                                       | OR                  | 95%CI     | P value | OR                     | 95%CI     | P value |
| Age ≥80 years                         | 0.86                | 0.50-1.47 | 0.6     |                        |           |         |
| Men                                   | 1.99                | 1.11-3.58 | 0.02    | 1.96                   | 1.13-3.55 | 0.02    |
| BMI ≤22 kg/m <sup>2</sup>             | 1.41                | 0.81-2.44 | 0.2     |                        |           |         |
| Current smoker                        | 0.78                | 0.31-1.98 | 0.6     |                        |           |         |
| Ambulatory                            | 0.89                | 0.47-1.66 | 0.7     |                        |           |         |
| Absence of prior HF hospitalization   | 1.87                | 1.00-3.51 | 0.04    | 2.10                   | 1.17-4.03 | 0.01    |
| Ischemic etiology                     | 1.61                | 0.93-2.79 | 0.1     |                        |           |         |
| ACS                                   |                     | N.A.      |         |                        | N.A.      |         |
| Non-ACS                               | 1.61                | 0.93-2.79 | 0.1     |                        |           |         |
| LV dysfunction (EF<40%)               | 0.96                | 0.55-1.68 | 0.9     | 0.64                   | 0.36-1.12 | 0.1     |
| <b>Comorbidities</b>                  |                     |           |         |                        |           |         |
| Hypertension                          | 1.39                | 0.73-2.65 | 0.3     |                        |           |         |
| Dyslipidemia                          | 0.83                | 0.47-1.47 | 0.5     |                        |           |         |
| Diabetes                              | 0.95                | 0.54-1.67 | 0.9     |                        |           |         |
| Prior myocardial infarction           | 1.00                | 0.52-1.91 | 0.9992  |                        |           |         |
| Prior stroke                          | 1.47                | 0.77-2.80 | 0.3     |                        |           |         |
| Peripheral artery disease             | 0.85                | 0.31-2.38 | 0.8     |                        |           |         |
| AF                                    | 1.06                | 0.62-1.81 | 0.8     | 1.60                   | 0.93-2.75 | 0.09    |
| Chronic kidney disease                | 1.34                | 0.78-2.29 | 0.3     |                        |           |         |
| Anemia                                | 0.69                | 0.40-1.18 | 0.2     |                        |           |         |
| Malignancy                            | 1.02                | 0.48-2.18 | 0.95    |                        |           |         |
| Dementia                              | 1.21                | 0.63-2.30 | 0.6     |                        |           |         |
| <b>Presentation at emergency room</b> |                     |           |         |                        |           |         |
| Systolic blood pressure <100 mmHg     | 0.26                | 0.04-1.87 | 0.09    |                        |           |         |
| Diastolic blood pressure >90 mmHg     | 1.40                | 0.82-2.41 | 0.2     |                        |           |         |
| Pulse rate >100 bpm                   | 1.50                | 0.87-2.60 | 0.1     |                        |           |         |
| NYHA class IV                         | 1.13                | 0.66-1.93 | 0.7     |                        |           |         |
| Body temperature ≥37.5 °C             | 1.18                | 0.42-3.30 | 0.8     |                        |           |         |
| AF at emergency room                  | 1.16                | 0.67-2.00 | 0.6     |                        |           |         |
| <b>Biomarkers</b>                     |                     |           |         |                        |           |         |
| High BNP/NT-proBNP*                   | 3.20                | 1.71-5.99 | <0.001  | 3.98                   | 2.18-7.72 | <0.001  |
| Serum albumin <3 g/dl                 | 1.35                | 0.68-2.70 | 0.4     |                        |           |         |
| eGFR <30 ml/min/1.73m <sup>2</sup>    | 1.20                | 0.67-2.14 | 0.5     |                        |           |         |
| Serum Na<135 mEq/l                    | 0.40                | 0.13-1.30 | 0.08    |                        |           |         |
| <b>Antithrombotic therapy</b>         | 0.87                | 0.48-1.56 | 0.6     |                        |           |         |
| Antiplatelet drugs                    | 0.62                | 0.35-1.12 | 0.1     |                        |           |         |
| Oral anticoagulants                   | 1.02                | 0.58-1.81 | 0.9     |                        |           |         |
| Heparin                               | 1.25                | 0.69-2.25 | 0.5     | 1.03                   | 0.56-1.83 | 0.9     |

\*Above the median in patients without ACS. BNP and NT-proBNP were measured in 3,373 and 659 patients, and the median [IQR] values of BNP and NT-proBNP were 721 [404-1,296] pg/ml and 5,784 [2,677-13,308] pg/ml. ACS=acute coronary syndrome, OR=odds ratio, CI=confidence interval, BMI=body mass index, HF=heart failure, LV=left ventricular, EF=ejection fraction, AF=atrial fibrillation, NYHA=New York Heart Association, BNP=B-type natriuretic peptide, NT-proBNP=N-terminal proBNP, ALB=albumin, eGFR=estimated glomerular filtration rate, Na=serum sodium.

**Table S3. Multivariable logistic regression analyses for the risk factors of ischemic stroke.**

| <b>Variables</b>                    | <b>Entire cohort</b> |              |                | <b>Excluding ACS</b> |              |                |
|-------------------------------------|----------------------|--------------|----------------|----------------------|--------------|----------------|
|                                     | <b>OR</b>            | <b>95%CI</b> | <b>P value</b> | <b>OR</b>            | <b>95%CI</b> | <b>P value</b> |
| Men                                 | 1.87                 | 1.11-3.23    | 0.02           | 1.95                 | 1.12-3.53    | 0.02           |
| Absence of prior HF hospitalization | 2.24                 | 1.24-4.29    | 0.007          | 2.18                 | 1.19-4.22    | 0.01           |
| ACS                                 | 2.31                 | 1.02-4.73    | 0.046          |                      | N.A.         |                |
| LV dysfunction (EF<40%)             | 0.64                 | 0.37-1.08    | 0.1            | 0.64                 | 0.36-1.12    | 0.1            |
| AF                                  | 1.50                 | 0.84-2.64    | 0.2            | 1.48                 | 0.80-2.70    | 0.2            |
| High BNP/NT-proBNP*                 | 3.16                 | 1.84-5.64    | <0.001         | 4.04                 | 2.20-7.87    | <0.001         |
| Heparin                             | 1.15                 | 0.66-1.96    | 0.6            | 1.07                 | 0.57-1.90    | 0.8            |
| Oral anticoagulants                 | 1.07                 | 0.55-2.01    | 0.8            | 1.21                 | 0.62-2.33    | 0.6            |

\*Above the median in each cohort. OR=odds ratio, CI=confidence interval, HF=heart failure, ACS=acute coronary syndrome, LV=left ventricular, EF=ejection fraction, AF=atrial fibrillation, BNP=B-type natriuretic peptide, NT-proBNP=N-terminal proBNP.

**Table S4. Baseline characteristics in patients with and without AF.**

| <b>Variables</b>                      | <b>AF (N=1898)</b>           | <b>No AF (N=2158)</b>        | <b>P value</b> |
|---------------------------------------|------------------------------|------------------------------|----------------|
| Age, years                            | 79.7±10.4                    | 76.4±13.1                    | <0.001         |
| Age ≥80 years                         | 1103 (58.1)                  | 1044 (48.4)                  | <0.001         |
| Men                                   | 1240 (57.5)                  | 998 (52.6)                   | 0.002          |
| BMI, kg/m <sup>2</sup>                | 22.9±4.4                     | 22.8±4.5                     | 0.4            |
| BMI ≤22 kg/m <sup>2</sup>             | 837 (46.3)                   | 950 (47.0)                   | 0.7            |
| Current smoker                        | 168 (9.1)                    | 308 (14.5)                   | <0.001         |
| Ambulatory                            | 1454 (77.3)                  | 1695 (79.5)                  | 0.1            |
| Prior HF hospitalization              | 800 (43.1)                   | 642 (30.2)                   | <0.001         |
| Ischemic etiology                     | 457 (24.1)                   | 870 (40.3)                   | <0.001         |
| ACS                                   | 41 (2.2)                     | 198 (9.2)                    | <0.001         |
| Non-ACS                               | 416 (21.9)                   | 672 (31.1)                   | <0.001         |
| HFpEF/HFmrEF/HFrEF                    | 973/344/574 (51.5/18.2/30.4) | 771/402/977 (35.9/18.7/45.4) | <0.001         |
| <b>Comorbidities</b>                  |                              |                              |                |
| Hypertension                          | 1305 (68.8)                  | 1604 (74.3)                  | <0.001         |
| Dyslipidemia                          | 662 (34.9)                   | 887 (41.1)                   | <0.001         |
| Diabetes                              | 619 (32.6)                   | 891 (41.3)                   | <0.001         |
| Prior myocardial infarction           | 336 (17.7)                   | 572 (26.5)                   | <0.001         |
| Prior stroke                          | 355 (18.7)                   | 307 (14.2)                   | <0.001         |
| Peripheral artery disease             | 149 (7.9)                    | 194 (9.0)                    | 0.2            |
| Chronic kidney disease                | 860 (45.3)                   | 949 (44.0)                   | 0.4            |
| Anemia                                | 1271 (67.1)                  | 1434 (66.6)                  | 0.7            |
| Malignancy                            | 271 (14.3)                   | 314 (14.6)                   | 0.8            |
| Dementia                              | 407 (21.4)                   | 363 (16.8)                   | <0.001         |
| <b>Presentation at emergency room</b> |                              |                              |                |
| Systolic blood pressure, mmHg         | 140.8±31.5                   | 152.8±37.4                   | <0.001         |
| Diastolic blood pressure, mmHg        | 83.5±22.9                    | 85.3±24.8                    | 0.02           |
| Pulse rate, bpm                       | 99.5±31.0                    | 92.9±23.7                    | <0.001         |
| Body temperature, °C                  | 36.5±0.6                     | 36.5±0.7                     | 0.7            |
| AF at emergency room                  | 1457 (76.8)                  | 0 (0.0)                      | <0.001         |
| NYHA III/IV                           | 854/780 (45.1/41.2)          | 735/1168 (34.3/54.5)         | <0.001         |
| <b>Biomarkers</b>                     |                              |                              |                |
| BNP, pg/ml (N=3,590)                  | 580 [339-981]                | 884 [475-1598]               | <0.001         |
| NT-proBNP, pg/ml (N=698)              | 4498 [2384-9645]             | 7354 [3764-16294]            | <0.001         |
| High BNP/NT-proBNP*                   | 729 (39.0)                   | 1270 (59.5)                  | <0.001         |
| Serum albumin, mg/dl                  | 3.5±0.5                      | 3.5±0.5                      | 0.004          |
| Serum albumin <3 g/dl                 | 232 (12.7)                   | 335 (15.9)                   | 0.004          |
| eGFR, ml/min/1.73m <sup>2</sup>       | 45.6±22.1                    | 45.7±24.6                    | 0.9            |
| eGFR <30 ml/min/1.73m <sup>2</sup>    | 491 (25.9)                   | 627 (29.1)                   | 0.02           |
| Serum Na, mEq/l                       | 139.1±4.3                    | 139.0±4.3                    | 0.4            |
| Serum Na <135 mEq/l                   | 240 (12.7)                   | 279 (13.0)                   | 0.8            |
| <b>Antithrombotic therapy</b>         | 1580 (83.2)                  | 1403 (65.0)                  | <0.001         |
| Antiplatelet drugs                    | 695 (36.6)                   | 939 (43.5)                   | <0.001         |
| Oral anticoagulants                   | 1098 (57.9)                  | 182 (8.4)                    | <0.001         |
| Warfarin                              | 707 (37.2)                   | 165 (7.6)                    | <0.001         |
| Direct oral anticoagulants            | 392 (20.7)                   | 17 (0.8)                     | <0.001         |
| Heparin                               | 421 (22.2)                   | 692 (32.1)                   | <0.001         |

\*Above the median in the entire cohort. AF=atrial fibrillation, OR=odds ratio, CI=confidence interval, BMI=body mass index, HF=heart failure, ACS=acute coronary syndrome, LV=left ventricular, EF=ejection fraction, NYHA=New York Heart Association, BNP=B-type natriuretic peptide, NT-proBNP=N-terminal proBNP, eGFR=estimated glomerular filtration rate, Na=serum sodium.

**Table S5. Baseline characteristic in patient with and without heparin, and those with and without OAC.**

| Variables                             | Heparin (+)<br>(N=1,113)        | Heparin (-)<br>(N=2,943)          | P<br>value | OAC (+)<br>(N=1,280)            | OAC (-)<br>(N=2,776)              | P<br>value |
|---------------------------------------|---------------------------------|-----------------------------------|------------|---------------------------------|-----------------------------------|------------|
| Age, years                            | 77.1±12.6                       | 78.3±11.8                         | 0.004      | 78.7±10.3                       | 77.6±12.7                         | 0.008      |
| Age ≥80 years                         | 562 (50.5)                      | 1585 (53.9)                       | 0.06       | 693 (54.1)                      | 1454 (52.4)                       | 0.3        |
| Men                                   | 625 (56.2)                      | 1613 (54.8)                       | 0.4        | 710 (55.5)                      | 1528 (55.0)                       | 0.8        |
| BMI, kg/m <sup>2</sup>                | 23.0±4.5                        | 22.7±4.5                          | 0.08       | 23.0±4.6                        | 22.8±4.4                          | 0.2        |
| BMI ≤22 kg/m <sup>2</sup>             | 460 (44.7)                      | 1327 (47.4)                       | 0.1        | 555 (45.2)                      | 1232 (47.4)                       | 0.2        |
| Current smoker                        | 137 (12.6)                      | 339 (11.7)                        | 0.4        | 107 (8.6)                       | 369 (13.5)                        | <0.001     |
| Ambulatory                            | 868 (78.3)                      | 2281 (78.5)                       | 0.9        | 1014 (80.0)                     | 2135 (77.7)                       | 0.1        |
| Prior HF hospitalization              | 298 (26.9)                      | 1144 (39.8)                       | <0.001     | 666 (53.2)                      | 776 (28.4)                        | <0.001     |
| Ischemic etiology                     | 471 (42.3)                      | 856 (29.1)                        | <0.001     | 333 (26.0)                      | 994 (35.8)                        | <0.001     |
| ACS                                   | 148 (13.3)                      | 91 (3.1)                          | <0.001     | 25 (2.0)                        | 214 (7.7)                         | <0.001     |
| Non-ACS                               | 323 (29.0)                      | 765 (26.0)                        | 0.053      | 308 (24.1)                      | 780 (28.1)                        | 0.007      |
| HFpEF/HFmrEF/HFrEF                    | 417/228/467<br>(37.5/20.5/42.0) | 1327/518/1084<br>(45.3/17.7/37.0) | <0.001     | 664/209/403<br>(52.0/16.4/31.6) | 1080/537/1148<br>(39.1/19.4/41.5) | <0.001     |
| <b>Comorbidities</b>                  |                                 |                                   |            |                                 |                                   |            |
| Hypertension                          | 829 (74.5)                      | 2080 (70.7)                       | 0.02       | 860 (67.2)                      | 2049 (73.8)                       | <0.001     |
| Dyslipidemia                          | 457 (41.1)                      | 1092 (37.1)                       | 0.02       | 491 (38.4)                      | 1058 (38.1)                       | 0.9        |
| Diabetes                              | 472 (42.4)                      | 1038 (35.3)                       | <0.001     | 444 (34.7)                      | 1066 (38.4)                       | 0.02       |
| Prior myocardial infarction           | 273 (24.5)                      | 635 (21.6)                        | 0.046      | 271 (21.2)                      | 637 (22.9)                        | 0.2        |
| Prior stroke                          | 173 (15.5)                      | 489 (16.6)                        | 0.4        | 280 (21.9)                      | 382 (13.8)                        | <0.001     |
| Peripheral artery disease             | 95 (8.5)                        | 248 (8.4)                         | 0.9        | 112 (8.8)                       | 231 (8.3)                         | 0.6        |
| AF                                    | 421 (37.8)                      | 1477 (50.2)                       | <0.001     | 1055 (82.4)                     | 626 (22.6)                        | <0.001     |
| Chronic kidney disease                | 536 (48.2)                      | 1273 (43.3)                       | 0.005      | 639 (49.9)                      | 1170 (42.1)                       | <0.001     |
| Anemia                                | 697 (62.7)                      | 2008 (68.4)                       | <0.001     | 893 (69.8)                      | 1812 (65.4)                       | 0.005      |
| Malignancy                            | 155 (13.9)                      | 430 (14.6)                        | 0.6        | 185 (14.5)                      | 400 (14.4)                        | 0.97       |
| Dementia                              | 231 (20.8)                      | 539 (18.3)                        | 0.08       | 227 (17.7)                      | 543 (19.6)                        | 0.2        |
| <b>Presentation at emergency room</b> |                                 |                                   |            |                                 |                                   |            |
| Systolic blood pressure, mmHg         | 145.8±34.9                      | 147.7±35.4                        | 0.1        | 138.2±31                        | 151.3±36.3                        | <0.001     |
| Diastolic blood pressure, mmHg        | 84.7±24.3                       | 84.4±23.8                         | 0.7        | 79.9±21.1                       | 86.5±24.9                         | <0.001     |
| Pulse rate, bpm                       | 98.8±27.2                       | 94.9±27.6                         | <0.001     | 92.9±27.7                       | 97.4±27.3                         | <0.001     |
| Body temperature, °C                  | 36.6±0.7                        | 36.5±0.6                          | <0.001     | 36.5±0.6                        | 36.5±0.7                          | 0.3        |
| AF at emergency room                  | 337 (30.3)                      | 1120 (38.1)                       | <0.001     | 825 (64.5)                      | 632 (22.8)                        | <0.001     |
| NYHA III/IV                           | 388/592 (35.0/53.5)             | 1201/1356 (41.0/46.3)             | <0.001     | 593/510 (46.4/39.9)             | 996/1438 (36.1/52.1)              | <0.001     |
| <b>Biomarkers</b>                     |                                 |                                   |            |                                 |                                   |            |
| BNP, pg/ml (N=3,590)                  | 758 [433-1425]                  | 705 [383-1262]                    | 0.003      | 565 [313-949]                   | 809 [454-1479]                    | <0.001     |
| NT-proBNP, pg/ml (N=698)              | 6571 [3077-11873]               | 5680 [2624-13324]                 | 0.5        | 4292 [2251-8518]                | 6754 [3221-15878]                 | <0.001     |
| High BNP/NT-proBNP*                   | 585 (53.2)                      | 1414 (48.7)                       | 0.01       | 476 (37.7)                      | 1523 (55.6)                       | <0.001     |
| Serum albumin, mg/dl                  | 3.4±0.5                         | 3.5±0.5                           | 0.1        | 3.5±0.5                         | 3.4±0.5                           | <0.001     |
| Serum albumin <3 g/dl                 | 155 (14.0)                      | 412 (14.5)                        | 0.7        | 136 (11.0)                      | 431 (16.0)                        | <0.001     |
| eGFR, ml/min/1.73m <sup>2</sup>       | 47.8±25.7                       | 44.9±22.5                         | 0.6        | 43.4±20.6                       | 46.7±24.6                         | <0.001     |
| eGFR <30 ml/min/1.73m <sup>2</sup>    | 282 (25.4)                      | 836 (28.5)                        | 0.047      | 372 (29.1)                      | 746 (26.9)                        | 0.2        |
| Serum Na, mEq/l                       | 138.9±4.6                       | 139.1±4.2                         | 0.4        | 139.1±4.2                       | 139±4.4                           | 0.9        |
| Serum Na <135 mEq/l                   | 147 (13.2)                      | 372 (12.7)                        | 0.6        | 160 (12.5)                      | 359 (13.0)                        | 0.7        |
| <b>Antithrombotic therapy</b>         |                                 |                                   |            |                                 |                                   |            |
| Antiplatelet drugs                    | 1113 (100)                      | 1870 (63.5)                       | <0.001     | 1280 (100)                      | 1703 (61.4)                       | <0.001     |
| OAC                                   | 465 (41.8)                      | 1169 (39.7)                       | 0.2        | 481 (37.6)                      | 1153 (41.5)                       | 0.02       |
| Warfarin                              | 165 (14.8)                      | 1115 (37.9)                       | <0.001     | 872 (68.0)                      | 0 (0.0)                           | <0.001     |
| Direct oral anticoagulants            | 119 (10.7)                      | 753 (25.6)                        | <0.001     | 409 (32.0)                      | 0 (0.0)                           | <0.001     |
| Heparin                               | 46 (4.1)                        | 363 (12.3)                        | <0.001     | 165 (12.9)                      | 948 (34.1)                        | <0.001     |

\*Above the median in the entire cohort. OAC=oral anticoagulants, AF=atrial fibrillation, OR=odds ratio,

CI=confidence interval, BMI=body mass index, HF=heart failure, ACS=acute coronary syndrome, LV=left ventricular, EF=ejection fraction, NYHA=New York Heart Association, BNP=B-type natriuretic peptide, NT-proBNP=N-terminal proBNP, eGFR=estimated glomerular filtration rate, Na=serum sodium.

**Figure S1. Forrest plots for the risk for ischemic stroke according to the quartiles of BNP levels and log-transformed BNP levels in patients with data on BNP.**

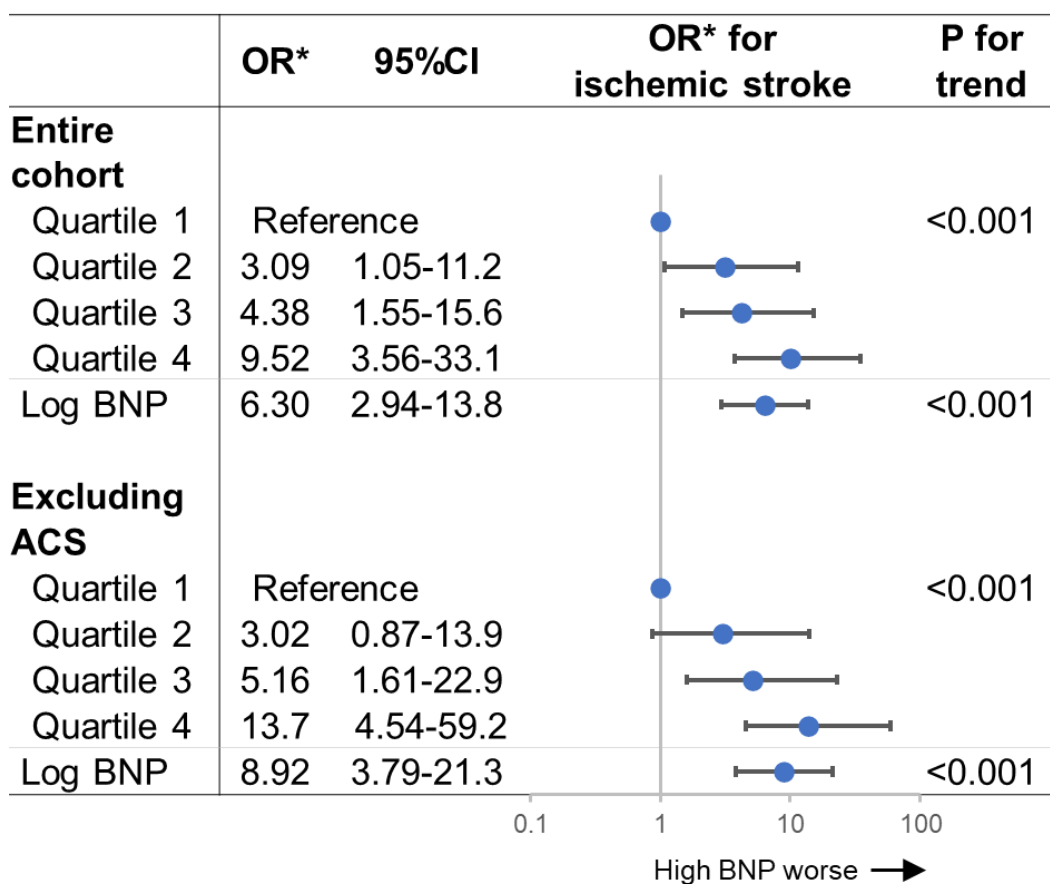

\*ORs were adjusted for sex, ACS, prior heart failure hospitalization, left ventricular dysfunction (ejection fraction <40%), atrial fibrillation, and use of intravenous heparin within 24 hours after admission.

OR=odds ratio, CI=confidence interval, ACS=acute coronary syndrome, BNP=B-type natriuretic peptide.
